# Supplementary material for: Pan-cancer analysis identifies ITIH1 as a novel prognostic indicator for hepatocellular carcinoma
Source: Aging (Albany NY). 2021 Mar 21;13(8):11096–119. doi: 10.18632/aging.202765 (PMC8109120; doi:10.18632/aging.202765)
Supplement: Supplementary Data 1 [file aging-13-202765-s002.xlsx]

## Sheet: Sheet1
Supplementary Data 1. Genes that were significantly co-expressed with ITIH1 across pan-cancers
Gene Symbol	Gene ID	Regression Coefficient
AMBP	ENSG00000106927.11	0.88
ITIH4	ENSG00000055955.15	0.86
APOC1	ENSG00000130208.9	0.85
PLG	ENSG00000122194.18	0.85
APOH	ENSG00000091583.10	0.84
F2	ENSG00000180210.14	0.83
PROC	ENSG00000115718.17	0.83
APOC4-APOC2	ENSG00000224916.8	0.81
ASGR1	ENSG00000141505.11	0.8
MST1	ENSG00000173531.15	0.8
VTN	ENSG00000109072.13	0.8
CFHR2	ENSG00000080910.11	0.79
ITIH3	ENSG00000162267.12	0.79
APOC2	ENSG00000234906.8	0.79
SERPINA10	ENSG00000140093.9	0.79
F12	ENSG00000131187.9	0.78
A1BG	ENSG00000121410.11	0.78
APOA2	ENSG00000158874.11	0.78
PON1	ENSG00000005421.8	0.78
APOC3	ENSG00000110245.11	0.77
SERPINC1	ENSG00000117601.13	0.77
RBP4	ENSG00000138207.12	0.77
HAO1	ENSG00000101323.4	0.77
RP11-116D2.1	ENSG00000261012.2	0.77
SERPINF2	ENSG00000167711.13	0.77
F11	ENSG00000088926.13	0.76
SERPINA4	ENSG00000100665.11	0.76
KNG1	ENSG00000113889.11	0.76
C8B	ENSG00000021852.12	0.76
AGXT	ENSG00000172482.4	0.76
C4BPB	ENSG00000123843.12	0.76
GAMT	ENSG00000130005.11	0.76
CPB2	ENSG00000080618.13	0.75
FTCD	ENSG00000160282.13	0.75
SLC38A3	ENSG00000188338.14	0.75
C8A	ENSG00000157131.10	0.75
SERPIND1	ENSG00000099937.10	0.75
GLYCTK	ENSG00000168237.17	0.75
SLC27A5	ENSG00000083807.9	0.75
MASP2	ENSG00000009724.16	0.75
TFR2	ENSG00000106327.12	0.74
HPX	ENSG00000110169.10	0.74
MAT1A	ENSG00000151224.12	0.74
APOA1	ENSG00000118137.9	0.74
ANG	ENSG00000214274.9	0.74
ASGR2	ENSG00000161944.16	0.74
CFHR1	ENSG00000244414.6	0.74
UPB1	ENSG00000100024.14	0.74
U91324.1	ENSG00000229740.1	0.73
ABCG5	ENSG00000138075.11	0.73
GC	ENSG00000145321.12	0.73
NR1I3	ENSG00000143257.11	0.73
PIPOX	ENSG00000179761.11	0.73
ALB	ENSG00000163631.16	0.73
CCL16	ENSG00000275152.4	0.73
KLKB1	ENSG00000164344.15	0.72
APOB	ENSG00000084674.13	0.72
C8G	ENSG00000176919.11	0.72
ORM2	ENSG00000228278.3	0.72
F5	ENSG00000198734.10	0.72
C3	ENSG00000125730.16	0.72
F13B	ENSG00000143278.3	0.71
ANGPTL3	ENSG00000132855.4	0.71
TF	ENSG00000091513.14	0.71
PCK2	ENSG00000100889.11	0.7
SAA4	ENSG00000148965.8	0.7
FGA	ENSG00000171560.14	0.7
CPN2	ENSG00000178772.6	0.7
RP11-344P13.4	ENSG00000228826.2	0.7
SARDH	ENSG00000123453.16	0.7
DPYS	ENSG00000147647.12	0.7
HFE2	ENSG00000168509.17	0.7
APOM	ENSG00000204444.10	0.7
C2	ENSG00000166278.14	0.7
FUOM	ENSG00000148803.11	0.69
PRODH2	ENSG00000250799.9	0.69
LEAP2	ENSG00000164406.7	0.69
F7	ENSG00000057593.13	0.69
CFB	ENSG00000243649.8	0.69
AFM	ENSG00000079557.4	0.69
HPR	ENSG00000261701.6	0.69
ADH1A	ENSG00000187758.7	0.69
ABCB4	ENSG00000005471.15	0.69
HP	ENSG00000257017.8	0.69
ABCG8	ENSG00000143921.6	0.68
PRAP1	ENSG00000165828.13	0.68
GCKR	ENSG00000084734.8	0.68
PLGLB1	ENSG00000183281.14	0.68
RP11-1151B14.3	ENSG00000267391.2	0.68
PLA2G12B	ENSG00000138308.5	0.68
APOC4	ENSG00000267467.3	0.68
HAAO	ENSG00000162882.14	0.68
MLXIPL	ENSG00000009950.15	0.68
IL27	ENSG00000197272.2	0.68
SERPINA1	ENSG00000197249.12	0.68
C3P1	ENSG00000167798.16	0.68
PLGLB2	ENSG00000125551.18	0.67
PFKFB1	ENSG00000158571.10	0.67
LINC01485	ENSG00000254211.5	0.67
CFHR2	ENSG00000276911.1	0.67
HRG	ENSG00000113905.4	0.67
CA5A	ENSG00000174990.4	0.67
TST	ENSG00000128311.13	0.67
SMLR1	ENSG00000256162.2	0.67
AHSG	ENSG00000145192.12	0.66
OTC	ENSG00000036473.6	0.66
ADH6	ENSG00000172955.17	0.66
MTTP	ENSG00000138823.12	0.66
EPHX1	ENSG00000143819.12	0.66
UGT2B10	ENSG00000109181.11	0.66
APCS	ENSG00000132703.3	0.66
RGN	ENSG00000130988.12	0.66
FGB	ENSG00000171564.11	0.66
HSD17B6	ENSG00000025423.11	0.65
PROZ	ENSG00000126231.13	0.65
SLC13A5	ENSG00000141485.15	0.65
RTP3	ENSG00000163825.3	0.65
A1CF	ENSG00000148584.14	0.65
GOLT1A	ENSG00000174567.7	0.65
CYP4F2	ENSG00000186115.12	0.65
DAO	ENSG00000110887.7	0.64
APOA5	ENSG00000110243.11	0.64
RNU1-70P	ENSG00000199488.1	0.64
SLC2A2	ENSG00000163581.13	0.64
LINC01430	ENSG00000237907.1	0.64
CYP4A22	ENSG00000162365.11	0.64
CYP2C8	ENSG00000138115.13	0.64
C5	ENSG00000106804.7	0.63
ACOT12	ENSG00000172497.8	0.63
APOF	ENSG00000175336.9	0.63
RP5-966M1.6	ENSG00000243696.4	0.63
SLC10A1	ENSG00000100652.4	0.63
CYP8B1	ENSG00000180432.5	0.63
ORM1	ENSG00000229314.5	0.63
RP5-968D22.3	ENSG00000237658.1	0.63
ITIH2	ENSG00000151655.17	0.63
CYP2C9	ENSG00000138109.9	0.63
ADORA2A-AS1	ENSG00000178803.10	0.63
AKR1C4	ENSG00000198610.10	0.63
FGG	ENSG00000171557.16	0.63
MPST	ENSG00000128309.16	0.63
RP4-710M16.2	ENSG00000223956.1	0.63
HULC	ENSG00000276019.1	0.62
GYS2	ENSG00000111713.2	0.62
PLGLA	ENSG00000240935.6	0.62
SLC22A7	ENSG00000137204.14	0.62
CYP4A11	ENSG00000187048.12	0.62
RP11-573D15.8	ENSG00000197099.8	0.62
SLCO1B1	ENSG00000134538.2	0.62
ARG1	ENSG00000118520.13	0.62
PXMP2	ENSG00000176894.9	0.62
CFH	ENSG00000000971.15	0.62
SERPING1	ENSG00000149131.15	0.62
F10	ENSG00000126218.11	0.61
CYP2D6	ENSG00000100197.20	0.61
HRSP12	ENSG00000132541.10	0.61
UGT2B4	ENSG00000156096.12	0.61
TMPRSS6	ENSG00000187045.16	0.61
LECT2	ENSG00000145826.8	0.61
LRG1	ENSG00000171236.9	0.61
PAQR9	ENSG00000188582.8	0.61
GBP7	ENSG00000213512.1	0.61
UGT2B15	ENSG00000196620.8	0.61
GALK1	ENSG00000108479.11	0.61
CES1	ENSG00000198848.12	0.6
F9	ENSG00000101981.10	0.6
SPP2	ENSG00000072080.10	0.6
CYP27A1	ENSG00000135929.8	0.6
CTD-2545H1.2	ENSG00000262445.3	0.6
SLC38A4	ENSG00000139209.15	0.6
TM4SF5	ENSG00000142484.6	0.6
ABCC6	ENSG00000091262.14	0.6
HNF4A-AS1	ENSG00000229005.2	0.6
CFHR3	ENSG00000116785.13	0.59
BAAT	ENSG00000136881.11	0.59
MST1P2	ENSG00000186301.8	0.59
RP11-328K4.1	ENSG00000248740.5	0.59
SLC22A1	ENSG00000175003.12	0.59
ALDOB	ENSG00000136872.17	0.59
RP5-849H19.3	ENSG00000278967.1	0.59
AADAC	ENSG00000114771.13	0.59
GJB1	ENSG00000169562.9	0.59
SERPINA11	ENSG00000186910.3	0.59
PAH	ENSG00000171759.8	0.59
RDH16	ENSG00000139547.7	0.59
DCXR	ENSG00000169738.7	0.59
ADH4	ENSG00000198099.8	0.59
C6	ENSG00000039537.13	0.58
SLC22A25	ENSG00000196600.12	0.58
RARRES2	ENSG00000106538.9	0.58
CREB3L3	ENSG00000060566.13	0.58
TTPA	ENSG00000137561.4	0.58
ETFB	ENSG00000105379.9	0.58
AMDHD1	ENSG00000139344.7	0.58
HULC	ENSG00000251164.1	0.58
AGT	ENSG00000135744.7	0.58
PGLYRP2	ENSG00000161031.12	0.58
PAQR9-AS1	ENSG00000241570.8	0.58
RP5-1103B4.3	ENSG00000236341.1	0.58
INHBC	ENSG00000175189.3	0.58
FETUB	ENSG00000090512.11	0.58
SLC51A	ENSG00000163959.9	0.58
SLC30A10	ENSG00000196660.10	0.58
RP11-622A1.2	ENSG00000250436.1	0.58
GLTPD2	ENSG00000182327.7	0.57
HGD	ENSG00000113924.11	0.57
SLC17A2	ENSG00000112337.10	0.57
AKR1C6P	ENSG00000151631.8	0.57
RP11-468N14.3	ENSG00000251424.1	0.57
CIDEB	ENSG00000136305.11	0.57
RP4-583P15.14	ENSG00000273047.1	0.57
SERPINA6	ENSG00000170099.5	0.57
GPT	ENSG00000167701.13	0.57
APOC1P1	ENSG00000214855.9	0.57
RP11-372E1.4	ENSG00000243818.4	0.57
PC	ENSG00000173599.13	0.56
ITIH4-AS1	ENSG00000239799.1	0.56
CTD-2350C19.2	ENSG00000265254.1	0.56
CDO1	ENSG00000129596.4	0.56
CCL15-CCL14	ENSG00000275688.4	0.56
PKLR	ENSG00000143627.17	0.56
SERPINA7	ENSG00000123561.14	0.56
SEC16B	ENSG00000120341.18	0.56
RP11-469A15.2	ENSG00000230623.2	0.56
APOE	ENSG00000130203.9	0.56
AGMO	ENSG00000187546.13	0.56
FMO5	ENSG00000131781.12	0.56
RP11-669E14.4	ENSG00000262881.1	0.56
RP11-1151B14.2	ENSG00000267675.1	0.56
MBL2	ENSG00000165471.6	0.56
PON3	ENSG00000105852.10	0.56
HYAL1	ENSG00000114378.16	0.56
AQP9	ENSG00000103569.9	0.56
TCP10L	ENSG00000242220.6	0.56
IGFBP1	ENSG00000146678.9	0.55
CTB-96E2.2	ENSG00000273171.1	0.55
RP11-38L15.8	ENSG00000272430.1	0.55
SLC22A9	ENSG00000149742.9	0.55
ACSM2B	ENSG00000066813.14	0.55
LINC01146	ENSG00000258867.5	0.55
DDT	ENSG00000099977.13	0.55
FAH	ENSG00000103876.11	0.55
C4BPA	ENSG00000123838.10	0.55
AOC4P	ENSG00000260105.6	0.55
CES2	ENSG00000172831.11	0.55
CTD-2619J13.8	ENSG00000268230.5	0.55
FGL1	ENSG00000104760.16	0.55
FABP1	ENSG00000163586.9	0.55
FMO3	ENSG00000007933.12	0.55
TMEM176B	ENSG00000106565.17	0.55
IGSF23	ENSG00000216588.8	0.55
AOX1	ENSG00000138356.13	0.55
SHBG	ENSG00000129214.14	0.55
HORMAD2-AS1	ENSG00000227117.6	0.55
URAHP	ENSG00000222019.7	0.55
PHYH	ENSG00000107537.13	0.54
C4A	ENSG00000244731.7	0.54
REEP6	ENSG00000115255.10	0.54
C4B	ENSG00000224389.8	0.54
OSGIN1	ENSG00000140961.12	0.54
MTHFS	ENSG00000136371.9	0.54
TRIM80P	ENSG00000232724.1	0.54
ADCY10	ENSG00000143199.17	0.54
CFHR4	ENSG00000134365.12	0.54
KHK	ENSG00000138030.12	0.53
HGFAC	ENSG00000109758.8	0.53
CTD-2540B15.11	ENSG00000267580.1	0.53
ECHS1	ENSG00000127884.4	0.53
CHST13	ENSG00000180767.9	0.53
ASPDH	ENSG00000204653.9	0.53
SLC25A47	ENSG00000140107.10	0.53
ENPP7	ENSG00000182156.9	0.53
PECR	ENSG00000115425.13	0.52
KRT17P8	ENSG00000256937.1	0.52
FAM99A	ENSG00000205866.3	0.52
RP11-180D21.3	ENSG00000224943.1	0.52
HMGCL	ENSG00000117305.14	0.52
OXER1	ENSG00000162881.6	0.52
RP11-740C1.2	ENSG00000231100.1	0.52
THPO	ENSG00000090534.17	0.52
INSIG1	ENSG00000186480.12	0.52
2020-03-02	ENSG00000117791.15	0.52
UGT1A1	ENSG00000241635.7	0.52
RP11-19D2.1	ENSG00000238102.1	0.52
CCND2P1	ENSG00000256847.1	0.52
RP11-959F10.6	ENSG00000256863.1	0.52
RP11-14C10.4	ENSG00000282793.1	0.52
RP11-41O4.1	ENSG00000266258.1	0.52
PCYT2	ENSG00000185813.10	0.52
RP4-680D5.8	ENSG00000272510.1	0.51
RP11-263G22.1	ENSG00000279218.1	0.51
TDO2	ENSG00000151790.8	0.51
RP11-14C10.4	ENSG00000277210.3	0.51
CTC-505O3.2	ENSG00000248709.1	0.51
BDH1	ENSG00000161267.11	0.51
AC022816.2	ENSG00000230647.1	0.51
SLC22A10	ENSG00000184999.11	0.51
RP4-669P10.16	ENSG00000232710.1	0.51
RP4-763G1.2	ENSG00000235200.1	0.51
ACSM5	ENSG00000183549.10	0.51
CYP2D7	ENSG00000205702.10	0.51
RP11-35N6.6	ENSG00000230328.2	0.51
SEPP1	ENSG00000250722.5	0.51
UROC1	ENSG00000159650.8	0.51
HAGH	ENSG00000063854.12	0.51
AC009963.3	ENSG00000233494.1	0.51
ASL	ENSG00000126522.16	0.51
POR	ENSG00000127948.13	0.51
ABCA6	ENSG00000154262.12	0.5
HPN	ENSG00000105707.13	0.5
BPHL	ENSG00000137274.12	0.5
RP11-209K10.2	ENSG00000259203.1	0.5
LAMA5-AS1	ENSG00000228812.7	0.5
ADH1B	ENSG00000196616.12	0.5
ADI1	ENSG00000182551.13	0.5
CYP2E1	ENSG00000130649.9	0.5
FGGY	ENSG00000172456.16	0.5
AL161668.5	ENSG00000258604.1	0.5
PHBP11	ENSG00000227621.1	0.5
SULT1A2	ENSG00000197165.10	0.5
ABCC6P1	ENSG00000256340.8	0.5
HS1BP3-IT1	ENSG00000231948.2	0.5
G6PC	ENSG00000131482.9	0.5
GRHPR	ENSG00000137106.17	0.5
AKR1D1	ENSG00000122787.14	0.5
UGT1A4	ENSG00000244474.5	0.49
RP11-659E9.2	ENSG00000240915.2	0.49
FAM47E-STBD1	ENSG00000272414.5	0.49
ALDH1L1	ENSG00000144908.13	0.49
CYP7A1	ENSG00000167910.3	0.49
TM6SF2	ENSG00000213996.12	0.49
ADH1C	ENSG00000248144.5	0.49
CFHR5	ENSG00000134389.9	0.49
NR0B2	ENSG00000131910.4	0.49
AC099668.5	ENSG00000259970.1	0.49
CPS1	ENSG00000021826.14	0.49
KLB	ENSG00000134962.6	0.49
PCK1	ENSG00000124253.10	0.49
ABCB11	ENSG00000073734.8	0.49
RP13-650J16.1	ENSG00000264569.1	0.49
TMEM56	ENSG00000152078.9	0.48
AP006216.5	ENSG00000236267.1	0.48
HMGCS2	ENSG00000134240.11	0.48
AC009166.5	ENSG00000261238.1	0.48
ADORA2BP1	ENSG00000236136.1	0.48
ACAA1	ENSG00000060971.17	0.48
UGT2B27P	ENSG00000251685.3	0.48
HPD	ENSG00000158104.11	0.48
CCL15	ENSG00000275718.1	0.48
ACY1	ENSG00000243989.7	0.48
C9	ENSG00000113600.10	0.48
TTC38	ENSG00000075234.16	0.48
ALDH4A1	ENSG00000159423.16	0.48
AP000355.2	ENSG00000228923.1	0.48
ACOX2	ENSG00000168306.12	0.48
RP11-484N16.1	ENSG00000266304.1	0.48
LBP	ENSG00000129988.5	0.48
RP11-42O15.3	ENSG00000271992.1	0.48
AC004862.6	ENSG00000232667.9	0.48
LINC01018	ENSG00000250056.5	0.48
CYP3A5	ENSG00000106258.13	0.47
ECI2	ENSG00000198721.12	0.47
SDS	ENSG00000135094.10	0.47
TMEM110	ENSG00000213533.11	0.47
TTC39C	ENSG00000168234.12	0.47
CYP2C18	ENSG00000108242.12	0.47
SULT2A1	ENSG00000105398.3	0.47
RP11-798K3.2	ENSG00000259347.5	0.47
SEPHS2	ENSG00000179918.16	0.47
GLS2	ENSG00000135423.12	0.47
CLDN14	ENSG00000159261.10	0.47
SLC25A20	ENSG00000178537.9	0.46
RHEBP2	ENSG00000226964.1	0.46
SOD1	ENSG00000142168.14	0.46
ALDH2	ENSG00000111275.12	0.46
RP11-753B14.1	ENSG00000237494.1	0.46
C19orf80	ENSG00000130173.13	0.46
KARSP2	ENSG00000230371.1	0.46
HSD11B1	ENSG00000117594.9	0.46
RP11-108O10.2	ENSG00000254990.5	0.46
C1S	ENSG00000182326.14	0.46
NAGS	ENSG00000161653.10	0.46
PLIN5	ENSG00000214456.8	0.46
NADK2	ENSG00000152620.12	0.45
TAT	ENSG00000198650.10	0.45
CTD-3128G10.7	ENSG00000276980.1	0.45
FGF21	ENSG00000105550.8	0.45
RP11-706C16.7	ENSG00000253196.1	0.45
TRIM55	ENSG00000147573.16	0.45
GSTA7P	ENSG00000237674.1	0.45
TMEM176A	ENSG00000002933.7	0.45
DKFZp779M0652	ENSG00000205106.4	0.45
TMEM56-RWDD3	ENSG00000271092.5	0.45
RP11-119D9.1	ENSG00000251637.6	0.45
DECR2	ENSG00000242612.6	0.45
GPAM	ENSG00000119927.13	0.45
CEBPA	ENSG00000245848.2	0.45
SLC27A2	ENSG00000140284.10	0.45
DECR1	ENSG00000104325.6	0.45
RNASE4	ENSG00000258818.3	0.45
TTC36	ENSG00000172425.10	0.44
LINC01348	ENSG00000280587.1	0.44
GSTA1	ENSG00000243955.5	0.44
GALT	ENSG00000213930.11	0.44
MTND4P20	ENSG00000233377.1	0.44
HAL	ENSG00000084110.10	0.44
SLC26A1	ENSG00000145217.13	0.44
KB-68A7.1	ENSG00000274225.1	0.44
ABCC2	ENSG00000023839.10	0.44
XYLB	ENSG00000093217.9	0.44
MTHFD1	ENSG00000100714.15	0.44
RP11-799B12.1	ENSG00000279332.1	0.44
GATM	ENSG00000171766.15	0.44
RP11-252E2.2	ENSG00000261058.1	0.44
RPL7AP34	ENSG00000213312.3	0.44
CTD-2619J13.27	ENSG00000273901.1	0.44
KDM8	ENSG00000155666.11	0.44
EHHADH	ENSG00000113790.10	0.44
FXYD1	ENSG00000266964.5	0.44
DGAT2	ENSG00000062282.14	0.43
CYP3A43	ENSG00000021461.16	0.43
ECHDC2	ENSG00000121310.16	0.43
CYP2A6	ENSG00000255974.6	0.43
DHODH	ENSG00000102967.11	0.43
AKR1C8P	ENSG00000264006.6	0.43
HIST1H2APS2	ENSG00000242387.1	0.43
RP11-333B6.1	ENSG00000278988.1	0.43
SLC43A1	ENSG00000149150.8	0.43
FH	ENSG00000091483.6	0.43
RP11-513G11.3	ENSG00000238097.1	0.43
BANF1P2	ENSG00000230306.1	0.43
RP11-297L17.2	ENSG00000260963.1	0.43
NUDT7	ENSG00000140876.11	0.42
RP11-563D10.1	ENSG00000227240.1	0.42
HSD17B13	ENSG00000170509.11	0.42
GOT1	ENSG00000120053.10	0.42
BHMT2	ENSG00000132840.9	0.42
TPPP2	ENSG00000179636.14	0.42
CTD-2619J13.5	ENSG00000279611.1	0.42
F10-AS1	ENSG00000231882.1	0.42
CFI	ENSG00000205403.12	0.42
CYB5A	ENSG00000166347.18	0.42
OR10J6P	ENSG00000158731.2	0.41
VNN3	ENSG00000093134.13	0.41
LDHD	ENSG00000166816.13	0.41
RAB11B-AS1	ENSG00000269386.5	0.41
TMEM82	ENSG00000162460.6	0.41
AC008592.4	ENSG00000251409.1	0.41
RP11-104J23.1	ENSG00000275944.1	0.41
DEPDC7	ENSG00000121690.9	0.41
FAM47E-STBD1	ENSG00000118804.8	0.41
RP11-130L8.2	ENSG00000269976.1	0.41
CYP3A7	ENSG00000160870.12	0.41
CYP2B6	ENSG00000197408.8	0.41
RP11-15I11.3	ENSG00000226251.5	0.41
HCN3	ENSG00000143630.9	0.41
XXbac-BPG116M5.17	ENSG00000244255.5	0.41
RP11-1267H10.3	ENSG00000251074.1	0.41
RP11-256L6.3	ENSG00000257878.1	0.41
UGT2A3P7	ENSG00000248886.2	0.41
RP11-115J16.1	ENSG00000254235.5	0.41
MGMT	ENSG00000170430.9	0.41
